# 1 The abundance and diversity of West Nile virus mosquito vectors in two Regional 2 Units of Greece during the onset of the 2018 transmission season

3

4 Marina Bisia<sup>1,2</sup>, Claire L Jeffries<sup>1</sup>, Ioanna Lytra<sup>3</sup>, Antonios Michaelakis<sup>3\*</sup> & Thomas  
5 Walker<sup>1\*</sup>

6

## 7 Author affiliations/institutional addresses

8 1. Department of Disease Control, Faculty of Infectious and Tropical Diseases, London  
9 School of Hygiene and Tropical Medicine, London, WC1E 7HT, UK.

10 2. The Royal Veterinary College, London, NW1 0TU, UK

11 3. Department of Entomology and Agricultural Zoology, Benaki Phytopathological Institute,  
12 Athens, Greece.

13

14 <sup>^</sup> authors contributed equally to the work

15 \*corresponding authors: [a.michaelakis@bpi.gr](mailto:a.michaelakis@bpi.gr), [thomas.walker@lshtm.ac.uk](mailto:thomas.walker@lshtm.ac.uk)

16

## 17 Abstract

18 **Background:** West Nile virus (WNV) is a zoonotic arbovirus of great medical and veterinary  
19 importance, threatening the health of humans and equines worldwide. Mosquitoes belonging  
20 to the *Culex* (*Cx.*) *pipiens* complex are major vectors but numerous other mosquito species  
21 have also been implicated as vectors of WNV. Due to variations in blood-feeding behaviour,  
22 the different biotypes and hybrids of *Cx. pipiens* influence the transmission of WNV, from  
23 enzootic cycles (between mosquitoes and birds), to spill-over transmission to humans and  
24 equines.

25 **Methods:** In this study, mosquitoes were collected and analysed from two regional units  
26 (RUs) of Greece with reported cases of WNV within the past 4 years; Palaio Flairo and  
27 Argolida (in Attica and Peloponnese regions, respectively). Collections using different types

28 of mosquito surveillance traps were undertaken in May-June 2018 during the early period of  
29 the WNV transmission season.

30 **Results:** A total of 1062 mosquitoes were collected, with Biogents Sentinel traps (BG traps)  
31 collecting both a greater number of mosquitoes across all species and *Cx. pipiens* complex  
32 individuals than Centres for Disease Control miniature light traps (CDC traps) or Heavy Duty  
33 Encephalitis Vector Survey traps (EVS traps). Identification of collected mosquitoes (using  
34 both morphological keys and molecular barcoding) confirmed the presence of additional  
35 species including *Aedes (Ae.) albopictus*, *Ae. caspius* and *Culiseta (Cs.) longiareolata*. The  
36 prevalence of *Cx. pipiens* biotypes in the RU of Palaio Faliro was 54.5% *pipiens* type, 20.0%  
37 *molestus* type and 25.5% hybrids. In the RU of Argolida, the collection comprised 68.1%  
38 *pipiens* type, 8.3% *molestus* type and 23.6% hybrids. Screening individual unfed female  
39 mosquitoes for WNV (molecular xenomonitoring) resulted in detection in three females of the  
40 *pipiens* type and in one hybrid; all collected from the RU of Argolida.

41 **Conclusions:** As hybrids play an important role in spill-over transmission of WNV to  
42 humans and equines, these findings highlight the importance of undertaking entomological  
43 surveillance programs incorporating molecular xenomonitoring at the onset of the  
44 transmission season to provide an early warning system for health authorities aiming to  
45 prevent WNV outbreaks in Greece.

46

## 47 **Keywords**

48 Mosquitoes, West Nile Virus, *Culex quinquefasciatus*, molecular xenomonitoring

49

## 50 **Background**

51 West Nile virus (WNV) is an arbovirus belonging to the Japanese encephalitis group within  
52 the *Flavivirus* genus (*Flaviviridae* family) and is the most widespread virus belonging to this  
53 genus [1–4]. Natural transmission of WNV mainly occurs in enzootic cycles between birds  
54 and competent ornithophilic mosquito vectors, with avian species being the principal

55 maintenance and amplifying hosts of WNV as many species develop sufficient viremia for  
56 onward transmission. This allows transmission to continue where competent mosquitoes are  
57 present in a specific area under suitable environmental conditions [5]. Additionally, spill-over  
58 transmission can occur when competent vectors feed on humans or horses. During natural  
59 transmission these mammalian species are considered dead-end hosts since they cannot  
60 sustain sufficient viraemia for further vector-borne transmission. However, infection in  
61 humans does pose a transmission risk due to the possibility of iatrogenic transmission  
62 through blood and tissue donations, in addition to the possibility of intrauterine transmission  
63 or WNV being passed on through breast milk [4]. Blood and tissue donor screening is  
64 essential in areas where WNV is endemic [6,7] and currently no human vaccination is  
65 available, however, vaccination of horses has been shown to reduce clinical disease in this  
66 species [8,9].

67 WNV was first isolated in 1937 from a woman with febrile illness in the West Nile district of  
68 Uganda [10]. WNV has caused numerous recent outbreaks in North America and Europe  
69 leading to major concern for human and animal health [3,11]. In North America, the  
70 majority of arboviral encephalitis cases are attributable to WNV [12]. Although ~80% of  
71 human WNV infections are asymptomatic, a broad clinical spectrum can result ranging from  
72 a mild flu-like illness in ~20% of infected individuals (West Nile fever) to severe neurological  
73 disease through infection of the central nervous system (<1% of infected individuals) that  
74 can lead to death from meningitis, encephalitis, and acute flaccid paralysis [13,14]. The high  
75 proportion of asymptomatic infections highlights that the number of human cases  
76 demonstrating overt disease, or discovered through laboratory testing, are just the 'tip of the  
77 iceberg' of the actual number of viral infections occurring within a population. Furthermore,  
78 these spill-over infections in humans are likely to be far less frequent compared to the  
79 amount of enzootic transmission occurring between mosquitoes and avian species. This  
80 emphasises the high value of surveillance in the monitoring and prevention of major  
81 outbreaks.

82 The introduction and spread of WNV in Europe is thought to have been driven by migratory  
83 birds [15–18]. WNV resulted in sporadic human cases from the mid-1990s [19] with the first  
84 large outbreak occurring in Romania with 393 hospitalised cases and 17 deaths [19,20].  
85 From 2010, the European Center for Disease Control (ECDC) have monitored WNV cases  
86 in the European Union and neighbouring countries and publishes weekly epidemiological  
87 reports [21]. In Greece, WNV was first detected in the summer of 2010 in the central  
88 Macedonia Region near the city of Thessaloniki, in the northern part of the country [22,23].  
89 This outbreak included 262 probable and confirmed cases of WNV infection of which 197  
90 were neuroinvasive cases and 35 deaths [24]. In 2011 WNV was found in both humans and  
91 horses; detected from clinical and laboratory surveillance techniques [25]. In the following  
92 years, cases of WNV in humans and animals were reported in central Greece and in the  
93 Attica Region but there were no reported cases in 2015 or 2016. In 2017, WNV re-emerged  
94 in southern Greece and in 2018 there were 311 laboratory confirmed human cases, resulting  
95 in 47 deaths, showing a marked increase over 2017, with only 48 confirmed cases and 5  
96 deaths [21,25]. Historical data of human cases with neurological disease in Greece from  
97 2010 until present show that cases increase in August (the peak month in the transmission  
98 season) and the largest case numbers were reported in August 2010 [24–26].

99 There have been over 60 species of mosquitoes in the USA implicated as potential WNV  
100 vector species [4]. Seven of these species occur in Europe and have been tested for WNV  
101 susceptibility including members of the *Culex (Cx.) pipiens* complex, *Ae. albopictus* and *Ae.*  
102 (*Ocherlotatus*) *caspius* [27]. *Cx. pipiens* has two behaviourally different biotypes, *pipiens*  
103 and *molestus*, which can form hybrids and their feeding behaviours influence their role in  
104 local transmission of WNV. The *pipiens* biotype is an important species for the enzootic  
105 WNV transmission cycle given its preference to feed on birds [28]. The *molestus* biotype  
106 and hybrids are implicated in the spill-over transmission of WNV from avian hosts to humans  
107 due to the opportunistic feeding behaviour of the *molestus* biotype [28,29]. Temperature has  
108 been shown to experimentally increase WNV transmission rates of the *pipiens* and hybrid

biotypes but have no effect on the *molestus* biotype [30]. In order to better understand the complexity of WNV transmission, entomological surveys for arboviral surveillance can be undertaken to determine both the presence of potential mosquito vectors and provide evidence for WNV circulation through virus detection in field-caught mosquitoes (molecular xenomonitoring). Here we report the results of an entomological survey undertaken in two Regional Units (RUs) of Greece (Palio Faliro in Attica region and Argolida in Peloponnese region) where WNV outbreaks have previously been recorded. We determined the prevalence of the *Cx. pipiens* biotypes (*pipiens*, *molestus* and hybrids) in each sampling location and female mosquitoes were screened for the presence of WNV to determine whether there was any evidence of virus circulation in the two RUs.

## Methods

### Mosquito collections

The study was carried out in 2 RUs within the Attica and Peloponnese regions of Greece, with three sampling locations selected from within each RU, and three trapping sites within each sampling location (**Fig. 1, Table 1**). Locations for trapping in the RU of Palaio Faliro were classified as urban, whereas those in the RU of Argolida were rural. In each sampling location, three different traps (trapping sites) were operating for 24 hours, three times per week. Trapping occurred over a six-week period (May-June 2018) during the start of the WNV transmission season (based on previous historical data obtained from ECDC [31]). A 3x3 Latin square design [32] was applied at each site to minimize confounding factors. Traps were placed more than 100m from each other and rotated every 24 hours between selected positions. Three different trap types were used in each site; Biogent sentinel (BG) traps, Heavy duty Encephalitis Vector Survey (EVS) traps and Centers for Disease Control miniature light (CDC) traps. Dry ice was used as an attractant in all traps with approximately 2 kg/ trap per 24 hours. Mosquitoes were collected every 24 hours, killed on dry ice and stored at -80°C. Morphological keys were used to identify individuals to species or species complex level [33] and female mosquitoes were classified as unfed (no evidence of blood in

their abdomen), blood fed or gravid. Individual mosquitoes were then placed in RNAlater (Invitrogen) to preserve RNA for downstream molecular analysis.

**Table 1.** Geographical locations with GPS co-ordinates of mosquito trapping sites within the Attica and Peloponnese regions of Greece.

| Region/Regional Unit | Sampling location (name) | Trapping site (street name or description) | GPS co-ordinates (decimal degrees) |           |
|----------------------|--------------------------|--------------------------------------------|------------------------------------|-----------|
|                      |                          |                                            | Latitude                           | Longitude |
| Attica/Palaio Faliro | Rema                     | Aristeidou str                             | 37.923972                          | 23.710106 |
|                      | Pikrodafnis              | Dimokritou str                             | 37.923836                          | 23.711511 |
|                      |                          | Sofokleous str                             | 37.922997                          | 23.710306 |
|                      |                          |                                            |                                    |           |
|                      | Dimarchio                | Terpsichoris str                           | 37.928111                          | 23.699008 |
|                      |                          | Naiadon str                                | 37.927989                          | 23.696631 |
|                      |                          | Athanasiadou str                           | 37.928819                          | 23.698006 |
|                      | KAPI                     | Seirionon str                              | 37.931997                          | 23.692625 |
|                      |                          | Esperou str                                | 37.931228                          | 23.692983 |
|                      |                          | Atlantos str                               | 37.931408                          | 23.692219 |
| Peloponnese/Argolida | Agia Triada              | Veterinary                                 | 37.636256                          | 22.798003 |
|                      |                          | Juice factory                              | 37.6404                            | 22.791736 |
|                      |                          | Private house                              | 37.638997                          | 22.805275 |
|                      | Nea Tirintha             | Guard room (prisons)                       | 37.596544                          | 22.799989 |
|                      |                          | Sheep area (prisons)                       | 37.594242                          | 22.796617 |
|                      |                          | Cattle area (prisons)                      | 37.592711                          | 22.797669 |
|                      | Dalamanara               | Horse area                                 | 37.611461                          | 22.739725 |
|                      |                          | Private house 1                            | 37.620261                          | 22.737842 |
|                      |                          | Private house 2                            | 37.612106                          | 22.738719 |

## **DNA/RNA extraction and cDNA synthesis**

DNA was extracted from individual male mosquitoes using QIAGEN DNeasy Blood and Tissue Kits according to manufacturer's instructions. DNA extracts were eluted in a final volume of 100 µL and stored at –20°C. RNA was extracted from individual female mosquitoes using Roche High Pure RNA Isolation Kits and QIAGEN RNeasy 96 kits according to manufacturer's instructions. RNA extracts were eluted in a final volume of 45 µL and stored at –80°C. RNA was reverse transcribed into complementary DNA (cDNA) using an Applied Biosystems High Capacity cDNA Reverse Transcription kit. A final volume of 20 µL contained 10 µL RNA, 2 µL 10X RT buffer, 0.8 µL 25X dNTPs (100 mM), 2 µL 10X random primers, 1µL reverse transcriptase and 4.2 µL nuclease-free water. Reverse transcription was undertaken in a Bio-Rad T100 Thermal Cycler as follows: 25°C for 10min, 37°C for 120min and 85°C for 5min, with the cDNA stored at –20°C.

## **Molecular identification of species**

Specimens morphologically identified as within the *Cx. pipiens* complex were identified to species level using a combination of multiplex species-specific PCR assays [34,35]. Additional confirmation of species was undertaken using sequencing of conserved cytochrome c oxidase 1 (CO1) gene fragments [36–38]. PCR products were separated and visualized using 2% E-gel EX agarose gels (Invitrogen) with SYBR safe and an Invitrogen E-gel iBase Real-Time Transilluminator. PCR products were submitted to Source BioScience (Source BioScience Plc, Nottingham, UK) for PCR reaction clean-up, followed by Sanger sequencing to generate both forward and reverse reads. Sequencing analysis was carried out in MEGA7 [39] as follows. Both chromatograms (forward and reverse traces) from each sample was manually checked, analyzed, and edited as required, followed by alignment by ClustalW and checking to produce consensus sequences. Consensus sequences were used to perform nucleotide BLAST (NCBI) database queries and sequences were compared to those available from GenBank (NCBI). Representative full consensus sequences for CO1

gene fragments were submitted to GenBank and assigned accession numbers MN005042-  
MN005056.

# **WNV screening**

WNV detection was undertaken using a WNV-specific real-time PCR assay [40]. Reactions were prepared using 5 µL of Qiagen QuantiTect SYBR® Green Master mix, a final concentration of 1 µM of each primer, 1 µL of PCR grade water and 2 µL template cDNA, to a final reaction volume of 10 µL. Prepared reactions were run on a Roche LightCycler® 96 System and PCR cycling conditions were as follows: 95°C for 10 min followed by 45 cycles of 95°C for 10 sec, 60°C for 10 sec, 72°C for 20 sec. PCR products were also separated and visualised using 2% E-Gel EX agarose gels (Invitrogen) with SYBR safe and an Invitrogen E-Gel iBase Real-Time Transilluminator to confirm successful amplification of the 144 base pair target fragment.

# **WNV case mapping**

Maps were constructed in ArcMap 10.5 (Esri, ArcGIS) using Global Administrative layers for Greece (level 3), downloaded from [www.gadm.org](http://www.gadm.org) (Version 3.6) and anonymized ECDC WNV case report data from “Transmission of West Nile virus, June to December 2018 – Table of cases, 2018 transmission season” downloaded from [www.ecdc.europa.eu](http://www.ecdc.europa.eu). The EU NUTS (Nomenclature of territorial units for statistics) level 3 regions as listed in the ECDC data sheet were matched to the Global Administrative layers level 3 (municipalities) during map construction, with each of the GADM level 3 municipalities matched to the corresponding NUTS level 3 region and assigned the same reported case data. The data from the ECDC surveillance Atlas was collected for each week of the transmission season, for human and equine cases, and then combined for each region, to generate maps of monthly reports.



## Statistical analysis

Non-parametric Mann Whitney U tests were performed in Microsoft Excel (version 16.21.1) to compare the number of *Cx. pipiens* complex mosquitoes for each trap type in a given sampling location.

## Results

### Mosquito species abundance and diversity

A total of 1062 mosquitoes comprising 840 unfed females, 28 blood fed females, 9 gravid females and 185 males were captured (**Table 2**). Species belonging to the *Cx. pipiens* complex were the most abundant, comprising 62.5% (n= 664) of the total collection across both RUs. Additional species collected included *Cs. longiareolata* (16.1%, n= 171), *Ae. caspius* (11.0%, n=117), *Ae. albopictus* (7.4%, n=79) and species belonging to the *Anopheles (An.) maculipennis* complex (1.8%, n=19). The remaining 1.1% (n=12) of mosquitoes were not possible to morphologically identify using keys due to damage during trapping. Individuals of the *Cx. pipiens* complex and *Cs. longiareolata* were collected from all sites within both regions. In the Attica region, *Ae. albopictus* was collected in all three sites and single individuals were also collected in Agia Triada and Dalamana within the RU of Argolida. In contrast, *Ae. caspius* and *An. maculipennis* complex individuals were collected in all three sites within the RU of Argolida but not from sites within the RU of Palaio Faliro.

**Table 2.** Mosquitoes collected from different locations in the Attica and Peloponnese regions of Greece using a variety of mosquito trap types.

| Region/<br>Regional<br>Unit | Sampling<br>location | Species/complex                     | Mosquitoes collected |               |            |           |       |                                  |
|-----------------------------|----------------------|-------------------------------------|----------------------|---------------|------------|-----------|-------|----------------------------------|
|                             |                      |                                     | Females              |               |            | Male<br>s | Total | % of<br>total in<br>locatio<br>n |
|                             |                      |                                     | Non blood<br>fed     | Bloo<br>d fed | Gravi<br>d |           |       |                                  |
| Attica/Palaio<br>Faliro     | Rema<br>Pikrodafnis  | <i>Cx. pipiens<br/>complex</i>      | 68                   | 6             | 3          | 1         | 78    | 55.7                             |
|                             |                      | <i>Ae. albopictus</i>               | 17                   | 0             | 0          | 33        | 50    | 35.7                             |
|                             |                      | <i>Cs. longiareolata</i>            | 1                    | 1             | 0          | 7         | 9     | 6.4                              |
|                             |                      | Unidentified                        | 3                    | 0             | 0          | 0         | 3     | 2.1                              |
|                             | Dimarchio            | <i>Cx. pipiens<br/>complex</i>      | 47                   | 1             | 0          | 0         | 48    | 64.9                             |
|                             |                      | <i>Ae. albopictus</i>               | 8                    | 0             | 0          | 5         | 13    | 17.6                             |
|                             |                      | <i>Cs. longiareolata</i>            | 0                    | 1             | 0          | 12        | 13    | 17.6                             |
|                             | KAPI                 | <i>Cx. pipiens<br/>complex</i>      | 106                  | 2             | 2          | 8         | 118   | 84.3                             |
|                             |                      | <i>Ae. albopictus</i>               | 4                    | 1             | 0          | 9         | 14    | 10.0                             |
|                             |                      | <i>Cs. longiareolata</i>            | 2                    | 1             | 0          | 4         | 7     | 5.0                              |
|                             |                      | Unidentified                        | 1                    | 0             | 0          | 0         | 1     | 0.7                              |
| Peloponnese<br>/ Argolida   | Agia Triada          | <i>Cx. pipiens<br/>complex</i>      | 101                  | 2             | 3          | 9         | 115   | 54.0                             |
|                             |                      | <i>Ae. albopictus</i>               | 1                    | 0             | 0          | 0         | 1     | 0.5                              |
|                             |                      | <i>Cs. longiareolata</i>            | 31                   | 0             | 0          | 64        | 95    | 44.6                             |
|                             |                      | <i>Ae. caspius</i>                  | 1                    | 0             | 0          | 0         | 1     | 0.5                              |
|                             |                      | <i>An. maculipennis<br/>complex</i> | 0                    | 0             | 0          | 1         | 1     | 0.5                              |
|                             | Nea Tirintha         | <i>Cx. pipiens<br/>complex</i>      | 140                  | 3             | 0          | 4         | 147   | 49.0                             |
|                             |                      | <i>Cs. longiareolata</i>            | 14                   | 1             | 0          | 23        | 38    | 12.7                             |
|                             |                      | <i>Ae. caspius</i>                  | 91                   | 2             | 0          | 1         | 94    | 31.3                             |
|                             |                      | <i>An. maculipennis<br/>complex</i> | 13                   | 3             | 0          | 0         | 16    | 5.3                              |
|                             |                      | Unidentified                        | 5                    | 0             | 0          | 0         | 5     | 1.7                              |
|                             | Dalamanara           | <i>Cx. pipiens<br/>complex</i>      | 153                  | 4             | 1          | 0         | 158   | 81.0                             |
|                             |                      | <i>Ae. albopictus</i>               | 1                    | 0             | 0          | 0         | 1     | 0.5                              |
|                             |                      | <i>Cs. longiareolata</i>            | 5                    | 0             | 0          | 4         | 9     | 4.6                              |
|                             |                      | <i>Ae. caspius</i>                  | 22                   | 0             | 0          | 0         | 22    | 11.3                             |
|                             |                      | <i>An. maculipennis<br/>complex</i> | 2                    | 0             | 0          | 0         | 2     | 1.0                              |
|                             | Unidentified         | 3                                   | 0                    | 0             | 0          | 3         | 1.5   |                                  |
| Total collected             |                      |                                     | 840                  | 28            | 9          | 185       | 1062  |                                  |

Mosquitoes were morphologically identified using keys and females were classified as non-blood fed (no visible blood in abdomen), blood fed or gravid.

## Species trap comparison

In both RUs, BG traps collected both more overall mosquitoes of all species, and a greater number of specimens from the *Cx. pipiens* complex than CDC traps and EVS traps (**Table 3**). As the data was not normally distributed, non-parametric Mann-Whitney tests were used to determine any significant differences in the number of *Cx. pipiens* complex mosquitoes collected using different trap types (**Table 3**). In the RU of Palaio Faliro, BG traps collected more *Cx. pipiens* complex mosquitoes (n=101) than CDC (n=46) and EVS (n=41) traps although the comparison between BG and CDC traps was not statistically significant (Mann-Whitney U=258.0, p=0.07). In the RU of Argolida BG traps collected significantly more *Cx. pipiens* complex (n=214) than CDC (n=69) and EVS (n=50) traps (Mann-Whitney U=40, p=0.02; U=32, p=0.01 respectively).

**Table 3.** Mann-Whitney statistical analysis comparing the number of *Cx. pipiens* complex mosquitoes collected using three traps.

| Region/Regional Unit  | Trap comparison | U-value | Z-score | p-value |
|-----------------------|-----------------|---------|---------|---------|
| Attica/Palaio Faliro  | BG vs. CDC      | 258.0   | 1.834   | 0.07    |
|                       | BG vs EVS       | 218.5   | 2.517   | 0.01    |
|                       | CDC vs. EVS     | 342.5   | 0.372   | 0.71    |
| Peloponnese/ Argolida | BG vs. CDC      | 40.0    | 2.256   | 0.02    |
|                       | BG vs EVS       | 32.0    | 2.667   | 0.01    |
|                       | CDC vs. EVS     | 76.5    | 0.385   | 0.70    |

Biogents Sentinel traps (BG traps), Centres for Disease Control miniature light traps (CDC traps) and Heavy-Duty Encephalitis Vector Survey traps (EVS traps).

## Molecular identification of species

Sanger sequencing of *CO1* gene fragments was undertaken to confirm morphological identification of species and to also determine the species of unidentified specimens that had been damaged during trapping. Representative *CO1* gene fragment sequences from individuals of the *Cx. pipiens* complex from all six collection sites across both RUs were obtained using a PCR assay designed for species identification for European *Cx. pipiens* complex species (38) (**Table 4**).

**Table 4.** *CO1* GenBank accession numbers for representatives of species confirmed by molecular identification.

| Specimen code | Sampling location | Morphological identification | <i>CO1</i> gene fragment (reference) | GenBank accession number |
|---------------|-------------------|------------------------------|--------------------------------------|--------------------------|
| AT1           | Agia Triada       | <i>Cx. pipiens</i>           | [38]                                 | MN005042                 |
| RP1           | Rema Pikrodafnis  | <i>Cx. pipiens</i>           | [38]                                 | MN005043                 |
| DI1           | Dimarchio         | <i>Cx. pipiens</i>           | [38]                                 | MN005044                 |
| DA1           | Dalamanara        | <i>Cx. pipiens</i>           | [38]                                 | MN005045                 |
| KA1           | Kapi              | <i>Cx. pipiens</i>           | [38]                                 | MN005046                 |
| NT1           | Nea Tirtha        | <i>Cx. pipiens</i>           | [38]                                 | MN005047                 |
| RP2           | Rema Pikrodafnis  | <i>Cs. longiareolata</i>     | [37]                                 | MN005048                 |
| DA2           | Dalamanara        | <i>Cs. longiareolata</i>     | [37]                                 | MN005049                 |
| AT2           | Agia Triada       | <i>Cs. longiareolata</i>     | [37]                                 | MN005050                 |
| NT2           | Nea Tirtha        | <i>Ae. caspius</i>           | [36]                                 | MN005051                 |
| AT3           | Agia Triada       | <i>Ae. caspius</i>           | [36]                                 | MN005052                 |
| DA3           | Dalamanara        | <i>Ae. caspius</i>           | [36]                                 | MN005053                 |
| DI2           | Dimarchio         | <i>Ae. albopictus</i>        | [37]                                 | MN005054                 |
| AT4           | Agia Triada       | <i>Ae. albopictus</i>        | [37]                                 | MN005055                 |
| RP3           | Rema Pikrodafnis  | <i>Ae. albopictus</i>        | [37]                                 | MN005056                 |

The location, species and *CO1* gene fragment in addition to the accession number on GenBank are shown.

Sequencing an additional *CO1* fragment [37] successfully confirmed the identification of *Cs. longiareolata* (n=3) and *Ae. albopictus* (n=3). Sequencing of a third *CO1* fragment [36] was required to successfully confirm *Ae. caspius* (n=3). However, Sanger sequencing of both *CO1* and internal transcribed spacer – 2 (*ITS2*) fragments [41] did not produce sequences of sufficient quality to successfully speciate individuals morphologically identified as within the *An. maculipennis* complex. Multiplex species-specific assays [42,43] revealed the presence of both biotypes of *Cx. pipiens* (*pipiens* type and *molestus* type) in addition to hybrids (**Fig. 2**). In the RU of Palaio Faliro overall 54.5% (n=79) were confirmed as the *pipiens* type, 20.0% (n=29) as the *molestus* type and 25.5% (n=37) as hybrids. In the RU of Argolida, 68.1% (n=98) were *pipiens* type, 8.3% (n=12) *molestus* type and 23.6% (n=34) hybrids.

#### **WNV infection rates in field mosquitoes**

A total of 630 individual mosquitoes (229 from RU of Palaio Faliro and 401 from RU of Argolida) were screened for the presence of WNV RNA and four *Cx. pipiens* complex individuals were WNV positive. qRT PCR results were confirmed by separation and visualisation of PCR products using gel electrophoresis. These positive individuals were unfed females which were molecularly identified as three *pipiens* type and one hybrid, all collected from the RU of Argolida at the end of May. This is interesting when compared to the spatial and temporal records of human and equine cases during 2018 (**Fig. 3**) as only one human case was recorded from the Peloponnese region all year, and not until August. This is in contrast to the RU of Palaio Faliro where, across the whole Attica region a total of 159 human cases were recorded in 2018, with the first reported cases occurring in June, but no WNV was detected in the mosquitoes collected from this region.

#### **Discussion**

Our mosquito trapping experiments using different adult traps show that in both regions BG traps collected both a larger number of mosquitoes of all species, and a greater number of individuals from the *Cx. pipiens* complex (although this was not statistically significant in the

RU of Palaio Faliro). Previous trap comparison studies undertaken in Europe report contrasting results, ranging from BG traps in Germany collecting more *Cx. pipiens* complex mosquitoes than CDC and EVS traps [44], to a study in Spain showing no statistically significant differences between BG and CDC traps in collecting specimens from this complex [45]. Although we measured temperature and humidity during our collection periods (Additional file 1), there are a variety of additional factors that can influence the collections obtained from adult mosquito traps including wind and the use of different attractants. Our results highlight that using a variety of trapping types can increase the species diversity of collections, however, targeting resources to just use BG traps may enable a greater number of target vector species – such as individuals of the *Cx. pipiens* complex – to be collected.

Although different mosquito species (across multiple genera) have been demonstrated to be competent vectors of WNV [46], the major vectors for WNV belong to the *Cx. pipiens* complex. In this study, we collected individuals of the *Cx. pipiens* complex in addition to other species including *Ae. albopictus*, *Cs. longiareolata* and *Ae. caspius* shown previously to be present in Greece [47,48]. The presence of the *pipiens* type, *molestus* type and hybrids in both the Attica and Peloponnese regions is consistent with previous studies in Greece [22,49,50]. We found variation in the prevalence of the different types with the *pipiens* type comprising 54.5% (n=79) in the RU of Palaio Faliro, 20.0% (n=20) *molestus* type and 25.5% (n=37) of hybrids. These results differ from another study that had found a more homogeneous *molestus* type population [49]. In RU of Argolida the biotypes of the *Cx. pipiens* complex were 68.1% (n=98) of *pipiens* type, 8.3% (n=12) of *molestus* type and 23.6% (n=34) of *molestus* and *pipiens* hybrids. The high percentage of hybrids in the RU is similar to a previous study conducted in the area after the 2017 outbreak that reported 37% hybrids, 41% *pipiens* and 22% *molestus* types [50].

The two biotypes are morphologically indistinguishable but have genetic, biological and behavioural differences. The *pipiens* type is anautogenous, so females need to consume a blood meal to lay eggs [22]. Furthermore, the *pipiens* type requires a large space to swarm for mating, are found above ground undergoing diapause and are primarily ornithophilic (preferring to feed on birds). In contrast, the *molestus* type is autogenous and can lay eggs without a blood meal. Mating can happen in confined spaces, while they live underground, do not undergo diapause, and are more anthropophilic, preferentially feeding on humans. Hybrid types are important in the epidemiology of WNV. In the USA, the high number of WNV cases in humans was correlated to the high number of hybrids [51]. Europe is considered to have more “pure” types but hybridization can result in a catholic feeding behaviour (feeding both on birds and mammals) increasing the risk of mixed populations acting as bridge-vectors of WNV between birds and humans/equines [49]. The feeding patterns of the different mosquito species, and the different types within the species complex, are important in order to identify the contribution of each vector to both the enzootic maintenance of WNV in avian hosts, and the spill-over transmission to humans and horses [52]. In northern Greece, the predominance of *pipiens* type could be facilitating the maintenance of the enzootic cycle of the virus between mosquitos and birds in the area [49]. The presence of the *molestus* type and the existence of hybrids can promote an opportunistic biting behaviour that could contribute to the spill-over of infection to humans and equines.

In our study, we also collected several other species that have been implicated or shown to be potential WNV vectors. Experimental transmission has been shown for both *Cs. longiareolata* and *Ae. albopictus* [1]. Species belonging to the *An. maculipennis* group are considered potential vectors of WNV [2]. Laboratory experiments have indicated that *Ae. caspius* may be incapable of transmitting WNV [27,53], however, in some countries the high densities, and detection of WNV in wild-caught specimens, have suggested this species may have a potential role in transmission, particularly during an outbreak when the level of virus

circulation is high [54]. The presence of *Ae. albopictus*, an invasive species that has expanded its range across Europe since the late 1970s, would suggest the potential for transmission of additional arboviruses. *Ae. albopictus* has the ability to adapt to colder temperatures and stay dormant during the winter and has previously been shown to be responsible for chikungunya virus outbreaks in Italy in 2007 [55]. *Ae. albopictus* has also been the principle vector responsible for dengue virus outbreaks in Hawaii in 2001-2002 and Mauritius in 2009 [56,57] and is a potential vector of Zika virus [58,59]. Furthermore, it can be a competent vector of WNV when experimentally tested in laboratory conditions [60] and in North America natural infections have been found. The opportunistic biting behaviour of *Ae. albopictus* may increase this species role as a vector of WNV. In Greece, since its first reported presence in 2003 in the western part of the country, *Ae. albopictus* has now spread to almost every district [48].

Detection of WNV virus RNA in four unfed *Cx. pipiens* complex specimens would indicate circulation of WNV in the RU of Argolida during our collection period in May. This would be supported by one human laboratory confirmed case reported in Peloponnese in 2018, however, it is interesting to note the reported human case didn't occur until August, suggesting WNV may have been circulating in the area for months before resulting in a case of human clinical disease. The confirmation that three of the positives were *pipiens* type, supports the possibility of virus circulating in an enzootic cycle, between birds and mosquitoes. However, the presence of WNV in one of the hybrids also demonstrates the potential for spill-over transmission to humans and equines in the area at this early time in the season. In comparison, no WNV was detected in mosquitoes collected from the RU of Palaio Faliro, but this area subsequently recorded a far greater number of human and equine cases during 2018, highlighting the likely variations in spatial and temporal transmission dynamics between these two very different localities, and the variable factors that can influence risk of infection and disease during the transmission season.



## Conclusions

Sampling during the onset of the 2018 WNV transmission season in the RUs of Attica and Peloponnese Regions was particularly important in a year in which more than 300 human cases were recorded in Greece. These results, combined with previous entomological surveys conducted in Greece, show the high occurrence of hybrids between the *pipiens* and *molestus* types of *Cx. pipiens*. Previous studies have demonstrated the importance of hybrids as bridge vectors of WNV. Their role in spill-over transmission to humans, and the presence of hybrids (and WNV infections) in RUs of Attica and Peloponnese regions of Greece suggest these areas are vulnerable to outbreaks. Furthermore, 2018 was the first year in Greece in which WNV human cases were recorded so early in the transmission period with six human cases confirmed by late June. Future entomological surveillance studies should incorporate molecular xenomonitoring to determine this potential expansion of the transmission season to provide early warning systems for potential WNV outbreaks. Notification of human WNV cases in Europe through the The European Surveillance System (TESSy) [61] of the ECDC allows a weekly map of human cases [31]. In addition, reporting of WNV encephalomyelitis in horses to the European Commission is carried out via the Animal Disease Notification System (ADNS). As reported cases of WNV infection in humans have been from southern and central European countries and a majority of human infections are asymptomatic, it is particularly important to undertake entomological and avian surveillance to determine if WNV circulation is occurring in particular area. In particular, entomological surveys to determine the distribution of mosquito vectors such as *Cx. pipiens* through the Pan-European VectorNet [62] will play a crucial role in an integrated approach to WNV surveillance and control efforts to minimise the impact of outbreaks on veterinary and public health.

## List of abbreviations

**WNV:** West Nile virus

405 **Cx:** *Culex*

406 **RUs** : Regional Units

407 **BG traps:** Biogent sentinel traps

408 **CDC traps:** Centres for Disease Control miniature light traps

409 **EVS traps:** Heavy Duty Encephalitis Vector Survey traps

410 **Ae:** *Aedes*

411 **Cs:** *Culiseta*

412 **An:** *Anopheles*

413 **ECDC:** European Center for Disease Control

414 **CO1:** cytochrome c oxidase 1

415

416

417 **Declarations**

418 **Ethics approval and consent to participate.**

419 The study protocol was reviewed and approved by the the institutional review boards of the

420 London School of Hygiene and Tropical Medicine (#15234).

421 **Consent for publication**

422 Not applicable.

423 **Availability of data and materials**

424 All representative mosquito species sequences are available from Genbank: accession

425 numbers MN005042-MN005056. The datasets generated on Collection, extraction and PCR

426 results are available at Open Science Framework: DOI 10.17605/OSF.IO/D76QF.

427 **Competing interests**

428 The authors declare that they have no competing interests

## **Funding**

Funding was provided by a Sir Henry Dale Wellcome Trust/Royal Society fellowship awarded to TW (101285): <http://www.wellcome.ac.uk>; <https://royalsociety.org>. Funding was also provided by a MSc Trust Fund Grant awarded to MB administered jointly by The Royal Veterinary College and London School of Hygiene and Tropical Medicine. This study was supported by Region of Attica and LIFE CONOPS project. The project "A systematic surveillance of vector mosquitoes for the control of mosquito- borne diseases in the Region of Attica" financed by the Region of Attica. The project LIFE CONOPS (LIFE12 ENV/GR/000466), "Development & demonstration of management plans against -the climate change enhanced- invasive mosquitoes in South Europe", funded by the European Commission in the framework of the programme LIFE + Environment Policy and Governance ([www.conops.gr](http://www.conops.gr); <http://ec.europa.eu/environment/life/index.htm>) awarded to AM. The funders had no role in study design, data collection and analysis, decision to publish, or preparation of the manuscript.

## **Authors' contributions**

MB contributed to conceptualization, data curation, formal analysis, investigation, methodology and writing of the original draft. CLJ contributed to conceptualization, data curation, formal analysis, investigation, methodology, supervision, writing of the original draft and review and editing of the manuscript. IL contributed to investigation and methodology. AM contributed to conceptualization, investigation, methodology, project administration, supervision and review and editing of the manuscript. TW contributed to conceptualization, data curation, formal analysis, investigation, methodology, funding acquisition, supervision, project administration, supervision, writing of the original draft and review and editing of the manuscript. All authors read and approved the final manuscript.

## **Acknowledgements**

The authors would like to thank Mrs A. Fikiri, Mrs A. Georgopoulou (Municipality of Palaio Faliro), Mr V. Karras, Mr G. Balatsos (Benaki Phytopathological Institute) and Mr P. Kalkounos (Agricultural Prison of Tirintha) for their active help to place the trap networking. We also want to thank Prof. D. Petric and Dr D. Papachristos for their comments and suggestions for the methodology on vectors surveillance.

## References

1. Hubalek Z, Halouzka J. West Nile fever--a reemerging mosquito-borne viral disease in Europe. *Emerg Infect Dis* 1999;5(5):643–50.
2. Hubalek Z. Mosquito-borne viruses in Europe. *Parasitol Res* 2008;103:S29-43.
3. Brustolin M, Talavera S, Santamaría C, Rivas R, Pujol N, Aranda C, et al. *Culex pipiens* and *Stegomyia albopicta* (=Aedes albopictus) populations as vectors for lineage 1 and 2 West Nile virus in Europe. *Med Vet Entomol*. 2016; 30(2):166-73.
4. Hayes EB, Komar N, Nasci RS, Montgomery SP, O'Leary DR, Campbell GL. Epidemiology and transmission dynamics of West Nile virus disease. *Emerging Infectious Diseases*. 2005;11(8):1167-73.
5. Vogels CBF, Hartemink N, Koenraadt CJM. Modelling West Nile virus transmission risk in Europe: Effect of temperature and mosquito biotypes on the basic reproduction number. *Sci Rep*. 2017;7(1):5022.
6. Custer B, Busch MP, Marfin AA, Petersen LR. The cost-effectiveness of screening the U.S. blood supply for West Nile virus. *Ann Intern Med*. 2005;143(7):486-92.
7. Korves CT, Goldie SJ, Murray MB. Cost-effectiveness of alternative blood-screening strategies for West Nile virus in the United States. *PLoS Med*. 2006;3(2):e21.
8. Bowen RA, Bosco-Lauth A, Syvrud K, Thomas A, Meinert TR, Ludlow DR, et al. Protection of horses from West Nile virus Lineage 2 challenge following immunization with a whole, inactivated WNV lineage 1 vaccine. *Vaccine*. 2014;32(42):5455-9.

- 479 9. Long MT, Gibbs EPJ, Mellencamp MW, Bowen RA, Seino KK, Zhang S, et al. Efficacy,  
480 duration, and onset of immunogenicity of a West Nile virus vaccine, live Flavivirus chimera,  
481 in horses with a clinical disease challenge model. *Equine Vet J.* 2007;39(6):491-7.
- 482 10. Hughes TP, Paul JH, Smithburn KC, Burke AW. A Neurotropic Virus Isolated from the  
483 Blood of a Native of Uganda 1. *Am J Trop Med Hyg.* 1940;4:471-92.
- 484 11. Gubler DJ. The continuing spread of West Nile virus in the Western Hemisphere. *Clin*  
485 *Infect Dis.* 2007;45(8):1039–46.
- 486 12. Grubaugh ND, Ebel GD. Dynamics of West Nile virus evolution in mosquito vectors.  
487 *Current Opinion in Virology.* 2016 ;21:132-138.
- 488 13. Colpitts TM, Conway MJ, Montgomery RR, Fikrig E. West Nile virus: Biology,  
489 transmission, and human infection. *Clin Microbiol Rev.* 2012;25(4):635-48.
- 490 14. Petersen LR, Marfin AA. West Nile virus: A primer for the clinician. *Annals of Internal*  
491 *Medicine.* 2002;137(3):173-9.
- 492 15. Jourdain E, Schuffenecker I, Korimbocus J, Reynard S, Murri S, Kayser Y, et al. West  
493 Nile Virus in Wild Resident Birds, Southern France, 2004. *Vector-Borne Zoonotic Dis.*  
494 2007;7(3):448-52.
- 495 16. Linke S, Niedrig M, Kaiser A, Ellerbrok H, Müller K, Müller T, et al. Serologic evidence of  
496 West Nile virus infections in wild birds captured in Germany. *Am J Trop Med Hyg.*  
497 2007;77(2):358-64.
- 498 17. Figuerola J, Soriguer R, Rojo G, Tejedor CG, Jimenez-Clavero MA. Seroconversion in  
499 wild birds and local circulation of West Nile virus, Spain. *Emerg Infect Dis.*  
500 2007;13(12):1915-7.
- 501 18. Calzolari M, Gaibani P, Bellini R, Defilippo F, Pierro A, Albieri A, et al. Mosquito, bird and  
502 human surveillance of West Nile and Usutu viruses in Emilia-Romagna Region (Italy) in  
503 2010. *PLoS One.* 2012;7(5):e38058.
- 504 19. Sambri V, Capobianchi MR, Cavrini F, Charrel R, Donoso-Mantke O, Escadafal C, et al.  
505 Diagnosis of west nile virus human infections: Overview and proposal of diagnostic protocols  
506 considering the results of external quality assessment studies. *Viruses.* 2013;5(10):2329-48.

507 20. Sejvar JJ. West Nile virus: an historical overview. *Ochsner J.* 2003;5(3):6-10.

508 21. European Centre for Disease Prevention and Control. Weekly updates: 2018 West Nile  
509 fever transmission season. Available from: [https://ecdc.europa.eu/en/west-nile-](https://ecdc.europa.eu/en/west-nile-fever/surveillance-and-disease-data/disease-data-ecdc)  
510 [fever/surveillance-and-disease-data/disease-data-ecdc](https://ecdc.europa.eu/en/west-nile-fever/surveillance-and-disease-data/disease-data-ecdc)

511 22. Papa A, Tsimitri T, Papadopoulou E, Testa T, Adamidis A, Gavana E, et al. Molecular  
512 detection and isolation of West Nile virus from a human case in northern Greece, 2013. *New*  
513 *microbes new Infect.* 2013;1(2):30-1.

514 23. Papa A, Danis K, Baka A, Bakas A, Dougas G, Lytras T, et al. Ongoing outbreak of west  
515 Nile virus infections in humans in Greece, July - August 2010. *Eurosurveillance.* 2010;15(34).  
516 pii: 19644.

517 24. Danis K, Papa A, Theocharopoulos G, Dougas G, Athanasiou M, Detsis M, et al.  
518 Outbreak of West Nile virus infection in Greece, 2010. *Emerg Infect Dis.* 2011;17(10):1868-  
519 72.

520 25. Hellenic Centre for Disease Control and Prevention (KEELPNO) - EPIET. [cited 2019  
521 May 29]. Available from: [https://ecdc.europa.eu/en/hellenic-centre-disease-control-and-](https://ecdc.europa.eu/en/hellenic-centre-disease-control-and-prevention-keelpno-epiet)  
522 [prevention-keelpno-epiet](https://ecdc.europa.eu/en/hellenic-centre-disease-control-and-prevention-keelpno-epiet)

523 26. Epidemiological update: West Nile virus transmission season in Europe, 2018. [cited  
524 2019 May 29]. [https://ecdc.europa.eu/en/news-events/epidemiological-update-west-nile-](https://ecdc.europa.eu/en/news-events/epidemiological-update-west-nile-virus-transmission-season-europe-2018)  
525 [virus-transmission-season-europe-2018](https://ecdc.europa.eu/en/news-events/epidemiological-update-west-nile-virus-transmission-season-europe-2018)

526 27. Vogels CBF, Göertz GP, Pijlman GP, Koenraadt CJM. Vector competence of European  
527 mosquitoes for West Nile virus. *Emerging Microbes and Infections.* 2017;6(11):e96.

528 28. Fritz ML, Walker ED, Miller JR, Severson DW, Dworkin I. Divergent host preferences of  
529 above- and below-ground *Culex pipiens* mosquitoes and their hybrid offspring. *Med Vet*  
530 *Entomol.* 2015;29(2):115-23.

531 29. Osorio HC, Ze-Ze L, Alves MJ. Host-feeding patterns of *Culex pipiens* and other  
532 potential mosquito vectors (Diptera: Culicidae) of West Nile virus (Flaviviridae) collected in  
533 Portugal. *J Med Entomol.* 2012;49(3):717-21.

- 534 30. Vogels CBF, Fros JJ, Göertz GP, Pijlman GP, Koenraadt CJM. Vector competence of  
535 northern European *Culex pipiens* biotypes and hybrids for West Nile virus is differentially  
536 affected by temperature. *Parasites and Vectors*. 2016;9(1):393.
- 537 31. European Centre for Disease Prevention and Control. Weekly updates: 2018 West Nile  
538 fever transmission season. [https://ecdc.europa.eu/en/west-nile-fever/surveillance-and-](https://ecdc.europa.eu/en/west-nile-fever/surveillance-and-disease-data/disease-data-ecdc)  
539 [disease-data/disease-data-ecdc](https://ecdc.europa.eu/en/west-nile-fever/surveillance-and-disease-data/disease-data-ecdc).
- 540 32. Perry JN, Wall C, Greenway AR. Latin Square designs in field experiments involving  
541 insect sex attractants. *Ecol Entomol*. 1980; 5(4): 385-96.
- 542 33. Samanidou-Voyadjoglou A, Harbach RE. Keys to the adult female mosquitoes  
543 (Culicidae) of Greece. *Eur Mosq Bull*. 2001;13(3):247-54.
- 544 34. Smith JL, Fonseca DM. Rapid assays for identification of members of the *Culex* (*Culex*)  
545 *pipiens* complex, their hybrids, and other sibling species (Diptera: culicidae). *Am J Trop Med*  
546 *Hyg*. 2004;70(4):339–45.
- 547 35. Bahnck CM, Fonseca DM. Rapid assay to identify the two genetic forms of *Culex* (*Culex*)  
548 *pipiens* L. (Diptera: Culicidae) and hybrid populations. *Am J Trop Med Hyg*. 2006;75(2):251–  
549 5.
- 550 36. Kumar NP, Rajavel AR, Natarajan R, Jambulingam P. DNA Barcodes Can Distinguish  
551 Species of Indian Mosquitoes (Diptera: Culicidae). *J Med Entomol*. 2007;44(1):1-7.
- 552 37. Folmer O, Black M, Heoh W, Lutz R, Vrijenhoek R. DNA primers for amplification of  
553 mitochondrial cytochrome c oxidase subunit I from diverse metazoan invertebrates. *Mol Mar*  
554 *Biol Biotechnol*. 1994;3(5):294-9.
- 555 38. Zittra C, Flechl E, Kothmayer M, Vitecek S, Rossiter H, Zechmeister T, et al. Ecological  
556 characterization and molecular differentiation of *Culex pipiens* complex taxa and *Culex*  
557 *torrentium* in eastern Austria. *Parasites and Vectors*. 2016;9(1):197.
- 558 39. Kumar S, Stecher G, Tamura K. MEGA7: Molecular Evolutionary Genetics Analysis  
559 Version 7.0 for Bigger Datasets. *Mol Biol Evol*. 2016;33(7):1870–4.
- 560 40. Linke S, Ellerbrok H, Niedrig M, Nitsche A, Pauli G. Detection of West Nile virus lineages  
561 1 and 2 by real-time PCR. *J Virol Methods*. 2007;146(1–2):355–8.

- 562 41. Beebe NW, Ellis JT, Cooper RD, Saul A. DNA sequence analysis of the ribosomal DNA  
563 ITS2 region for the *Anopheles punctulatus* group of mosquitoes. *Insect Mol Biol*.  
564 1999;8(3):381–90.
- 565 42. Bahnck CM, Fonseca DM. Rapid assay to identify the two genetic forms of *Culex* (*Culex*)  
566 pipiens L. (Diptera: Culicidae) and hybrid populations. *Am J Trop Med Hyg*. 2006;75(2):251–  
567 5.
- 568 43. Smith JL, Fonseca DM. Rapid assays for identification of members of the *Culex* (*Culex*)  
569 pipiens complex, their hybrids, and other sibling species (Diptera: culicidae). *Am J Trop Med*  
570 *Hyg*. 2004;70(4):339–45.
- 571 44. Lühken R, Pfitzner WP, Börstler J, Garms R, Huber K, Schork N, et al. Field evaluation  
572 of four widely used mosquito traps in Central Europe. *Parasites and Vectors*. 2014;7:268.
- 573 45. Roiz D, Roussel M, Munõz J, Ruiz S, Soriguer R, Figuerola J. Efficacy of mosquito traps  
574 for collecting potential west nile mosquito vectors in a natural mediterranean wetland. *Am J*  
575 *Trop Med Hyg*. 2012;86(4):642-8.
- 576 46. Ciota AT. West Nile virus and its vectors. *Current Opinion in Insect Science*. 2017;22:28-  
577 36.
- 578 47. Darsie RF, Samanidou-Voyadjoglou A. Keys for the identification of the mosquitoes of  
579 Greece. *J Am Mosq Control Assoc*. 1997;13(3):247-54.
- 580 48. Badieritakis, Papachristos D, Latinopoulos D, Stefopoulou, Kolimenakis, Bithas K, et al.  
581 *Aedes albopictus* (Skuse, 1895) (Diptera: Culicidae) in Greece: 13 years of living with the  
582 Asian tiger mosquito. *Parasitol Res*. 2017;117(2):453-460.
- 583 49. Gomes B, Kioulos E, Papa A, Almeida AP, Vontas J, Pinto J. Distribution and  
584 hybridization of *Culex pipiens* forms in Greece during the West Nile virus outbreak of 2010.  
585 *Infect Genet Evol*. 2013;16:218–25.
- 586 50. Mavridis K, Fotakis EA, Kioulos I, Mpellou S, Konstantas S, Varela E, et al. Detection of  
587 West Nile Virus – Lineage 2 in *Culex pipiens* mosquitoes, associated with disease outbreak  
588 in Greece, 2017. *Acta Trop*. 2018;182:64-68.
- 589 51. Ciota AT, Chin PA, Kramer LD. The effect of hybridization of *Culex pipiens* complex



590 mosquitoes on transmission of West Nile virus. *Parasit Vectors*. 2013;6(1):305.

591 52. Molaei G, Andreadis TG, Armstrong PM, Anderson JF, Vossbrinck CR. Host feeding  
592 patterns of *Culex* mosquitoes and west nile virus transmission, northeastern United States.  
593 *Emerg Infect Dis*. 2006;12(3):468-74.

594 53. Balenghien T, Vazeille M, Grandadam M, Schaffner F, Zeller H, Reiter P, et al. Vector  
595 competence of some French *Culex* and *Aedes* mosquitoes for West Nile virus. *Vector Borne*  
596 *Zoonotic Dis*. 2008;8(5):589–95.

597 54. Mancini G, Montarsi F, Calzolari M, Capelli G, Dottori M, Ravagnan S, et al. Mosquito  
598 species involved in the circulation of West Nile and Usutu viruses in Italy. *Vet Ital*.  
599 2017;53(2):97-110.

600 55. Paupy C, Delatte H, Bagny L, Corbel V, Fontenille D. *Aedes albopictus*, an arbovirus  
601 vector: from the darkness to the light. *Microbes Infect*. 2009;11(14–15):1177–85.

602 56. Effler P V, Pang L, Kitsutani P, Vorndam V, Nakata M, Ayers T, et al. Dengue fever,  
603 Hawaii, 2001-2002. *Emerg Infect Dis*. 2005;11(5):742–9.

604 57. Ramchurn SK, Moheeput K, Goorah SS. An analysis of a short-lived outbreak of dengue  
605 fever in Mauritius. *Euro Surveill*. 2009;14(34).

606 58. Wong PS, Li MZ, Chong CS, Ng LC, Tan CH. *Aedes* (*Stegomyia*) *albopictus* (Skuse): a  
607 potential vector of Zika virus in Singapore. *PLoS Negl Trop Dis*. 2013;7(8):e2348.

608 59. Grard G, Caron M, Mombo IM, Nkoghe D, Mboui Ondo S, Jiolle D, et al. Zika Virus in  
609 Gabon (Central Africa) - 2007: A New Threat from *Aedes albopictus*? *PLoS Negl Trop Dis*.  
610 2014;8(2):e2681.

611 60. Fortuna C, Remoli ME, Severini F, Di Luca M, Toma L, Fois F, et al. Evaluation of vector  
612 competence for West Nile virus in Italian *Stegomyia albopicta* (= *Aedes albopictus*)  
613 mosquitoes. *Med Vet Entomol*. 2015;29(4):430-3.

614 61. European Centre for Disease Prevention and Control (ECDC). The European  
615 Surveillance System (TESSy). [https://ecdc.europa.eu/en/publications-data/european-](https://ecdc.europa.eu/en/publications-data/european-surveillance-system-tessy)  
616 [surveillance-system-tessy](https://ecdc.europa.eu/en/publications-data/european-surveillance-system-tessy).

617 62. European Centre for Disease Prevention and Control. European network for sharing

data on the geographic distribution of arthropod vectors, transmitting human and animal disease agents (VectorNet). <https://ecdc.europa.eu/en/about-us/partnerships-and-networks/disease-and-laboratory-networks/vector-net>.

## Figure legends

**Fig. 1.** Locations of collection sites within Regional Unit of Palaio Faliro in Attica Region (lower right) and Regional Unit of Argolida in Peloponnese region (lower left). Maps constructed in ArcMap 10.5 (Esri, ArcGIS), using World Topographic Basemap and GPS coordinates from trap locations.

**Fig. 2.** Prevalence rates of *Cx. pipiens* biotypes. Mosquitoes analysed using multiplex species-specific PCR assays were from three sampling locations in Regional Unit of Palaio Faliro in Attica Region (A) and Regional Unit of Argolida in Peloponnese region (B) of Greece during May-June 2018.

**Fig. 3.** Reported human and equine cases of WNV in the 2018 transmission season. Maps were constructed in ArcMap 10.5 (Esri, ArcGIS) using Global Administrative layers for Greece (level 3), downloaded from [www.gadm.org](http://www.gadm.org) (Version 3.6) and ECDC WNV case report data from “Transmission of West Nile virus, June to December 2018 – Table of cases, 2018 transmission season” downloaded from [www.ecdc.europa.eu](http://www.ecdc.europa.eu). The data from the ECDC surveillance Atlas was collected for each week of the transmission season, for human and equine cases, and then combined for each region, to generate maps of monthly reports.

## Additional file 1

Temperature (°C) and relative humidity (%) during the collection periods in Regional Unit of Palaio Faliro in Attica Region (A) and Regional Unit of Argolida in Peloponnese region (B) of Greece.

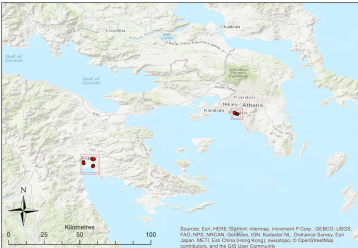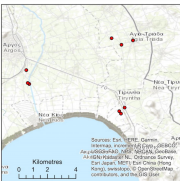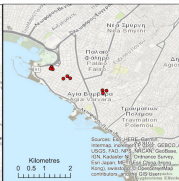

## RU of Palaio Faliro in Attica Region

Rema Pikrodafnis

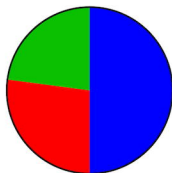

Total=48

pipiens biotype  
molestus biotype  
hybrid

Dimarchio

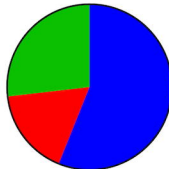

Total=41

pipiens biotype  
molestus biotype  
hybrid

KAPI

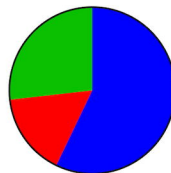

Total=56

pipiens biotype  
molestus biotype  
hybrid

## RU of Argolida in Peloponnese Region

Agia Triada

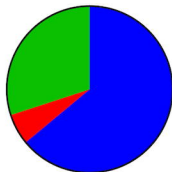

Total=50

pipiens biotype  
molestus biotype  
hybrid

NeaTirinta

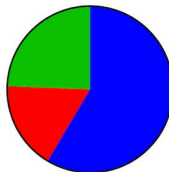

Total=41

pipiens biotype  
molestus biotype  
hybrid

Dalamanara

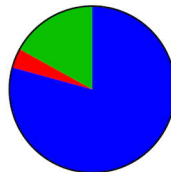

Total=53

pipiens biotype  
molestus biotype  
hybrid

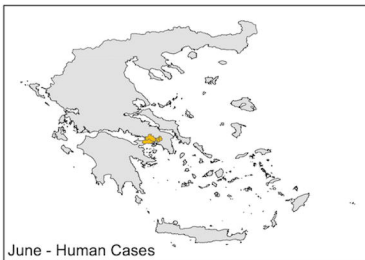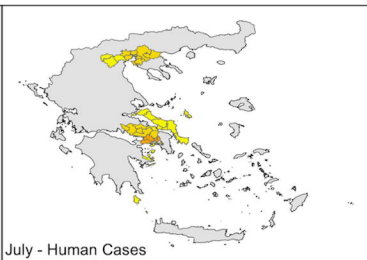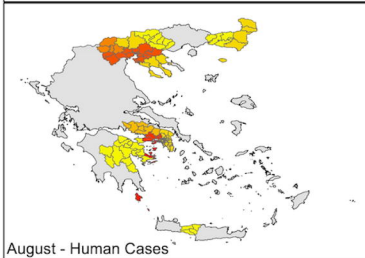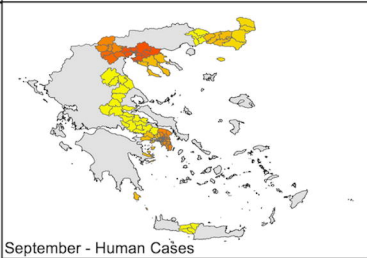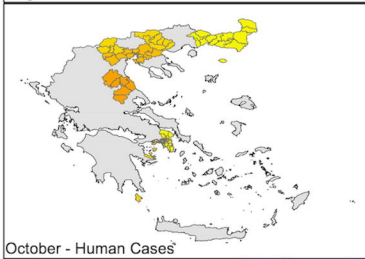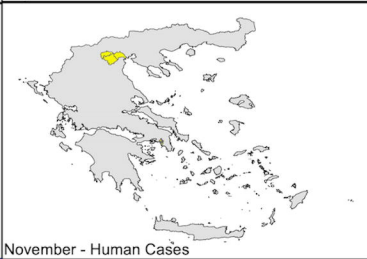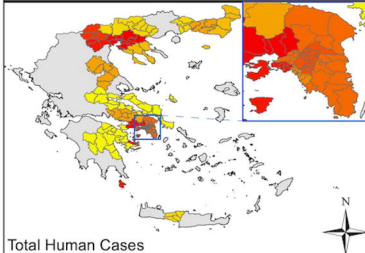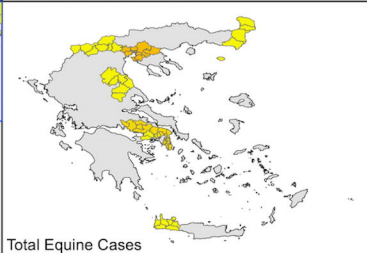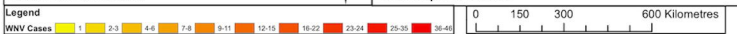

Source: http://biorxiv.org/content/10.1101/735522v1.full.pdf
